# Supplementary material
Source: PubMed Central journal article supplement (PMC3185120)

S1

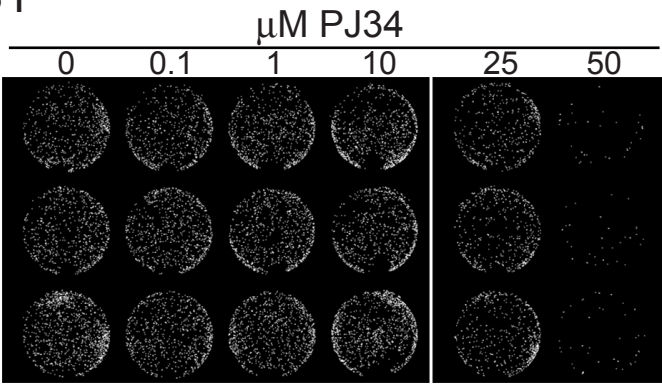

S2

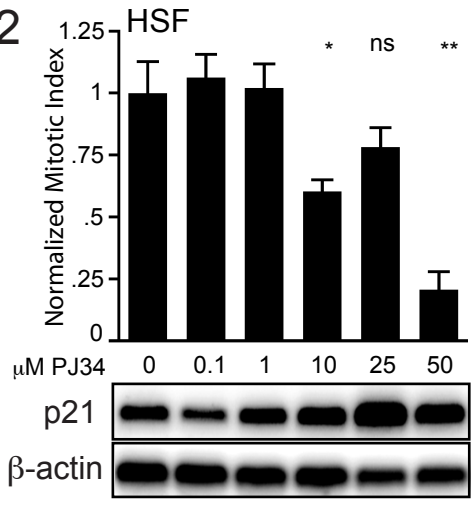

S3

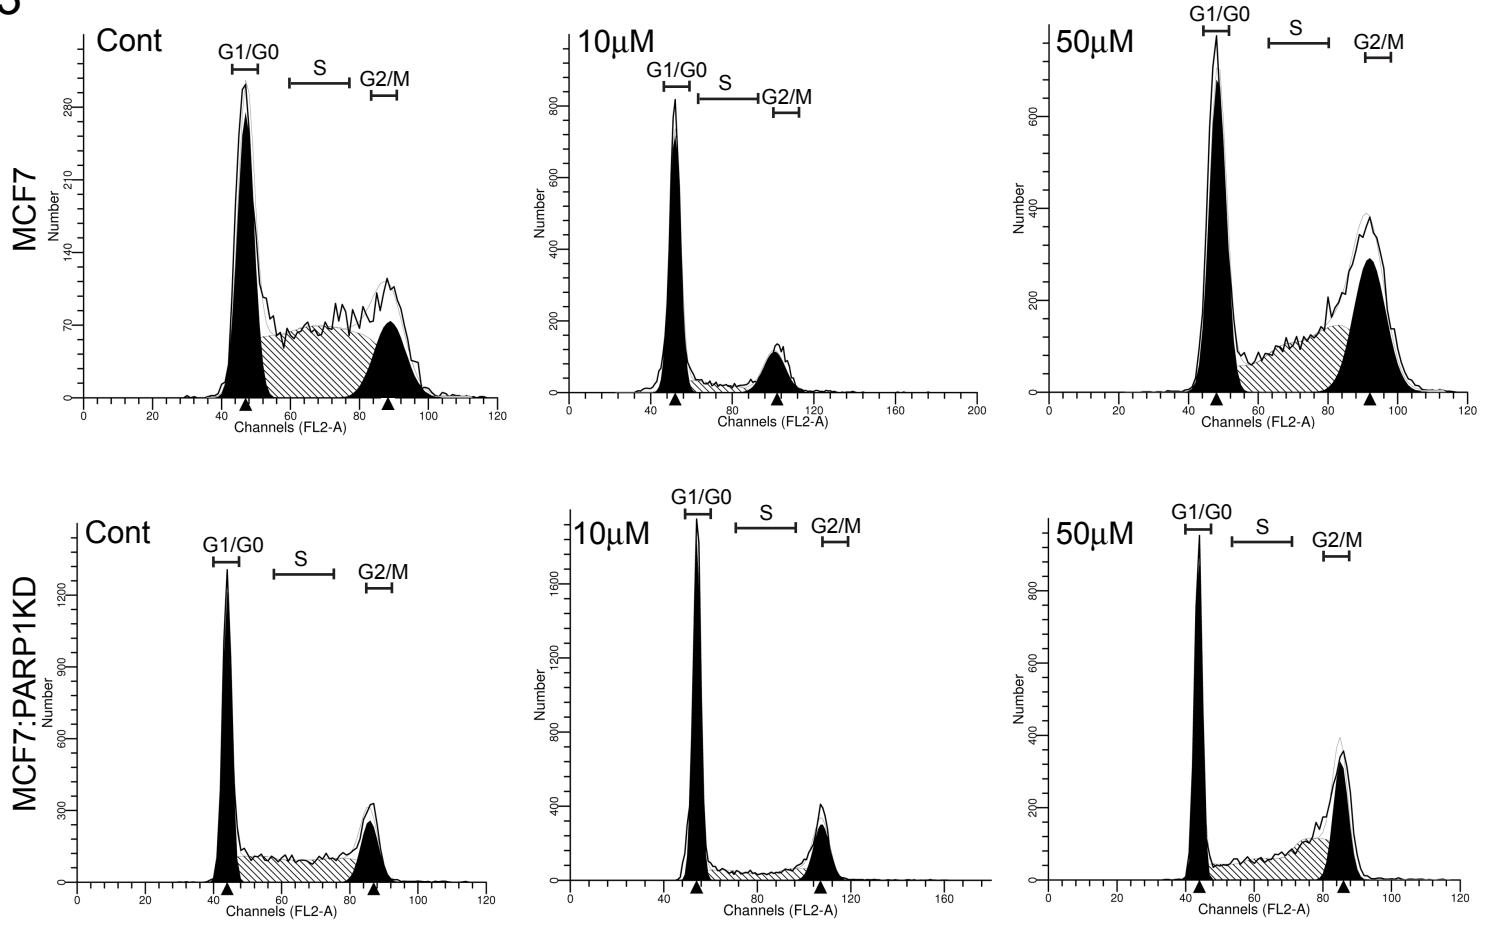

S4

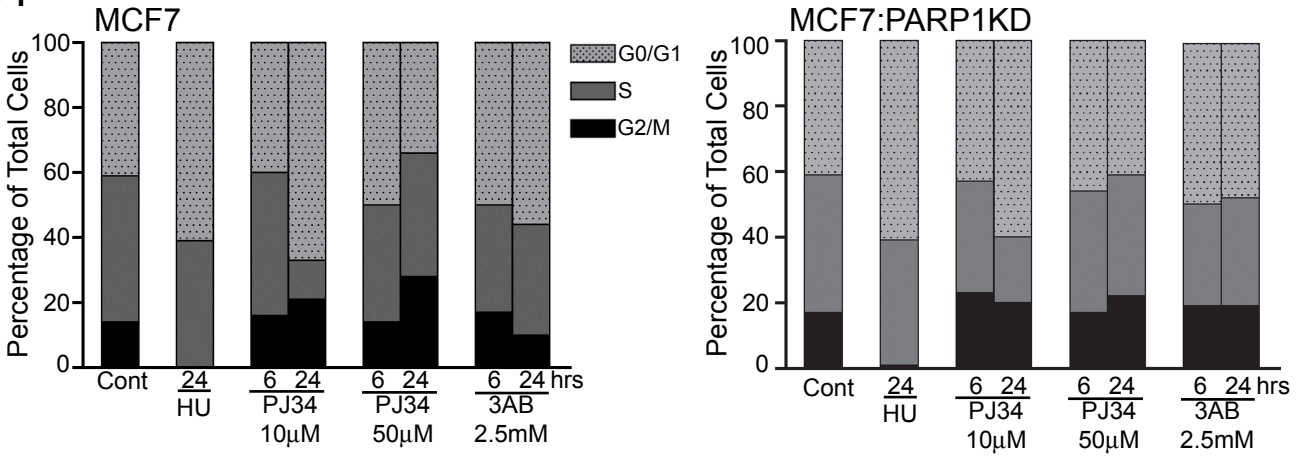

Supplement: NIHMS316213-supplement-01.pdf [file NIHMS316213-supplement-01.pdf]

S5

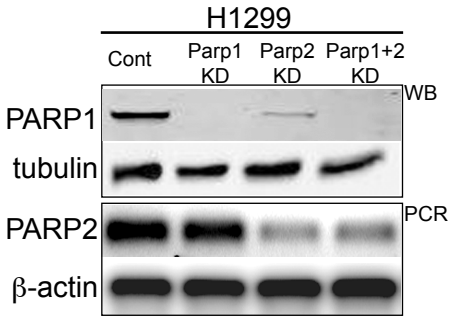

S6

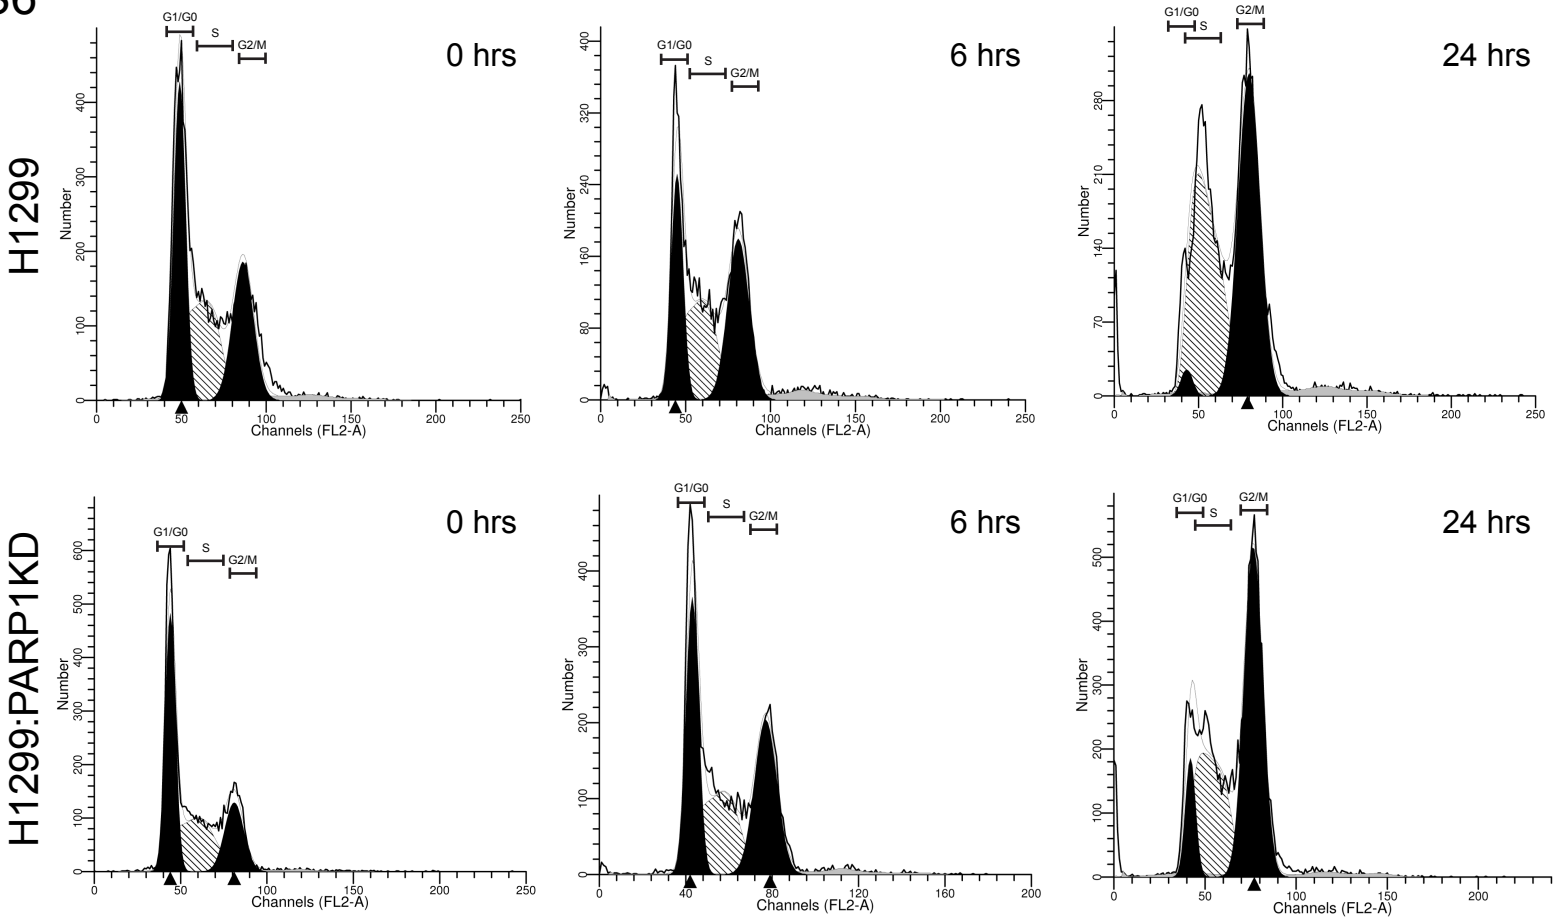

S7

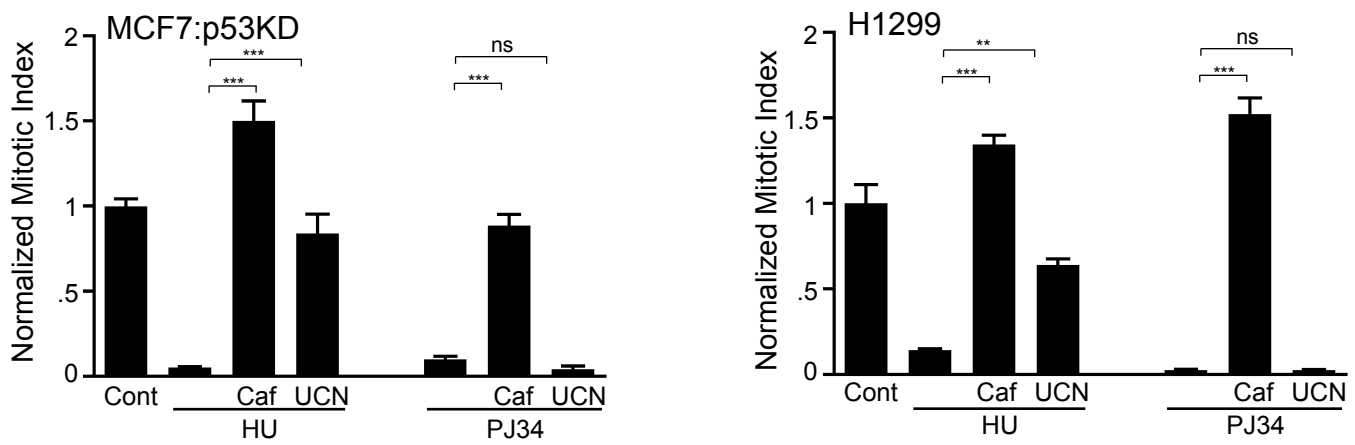

Supplement: NIHMS316213-supplement-02.pdf [file NIHMS316213-supplement-02.pdf]

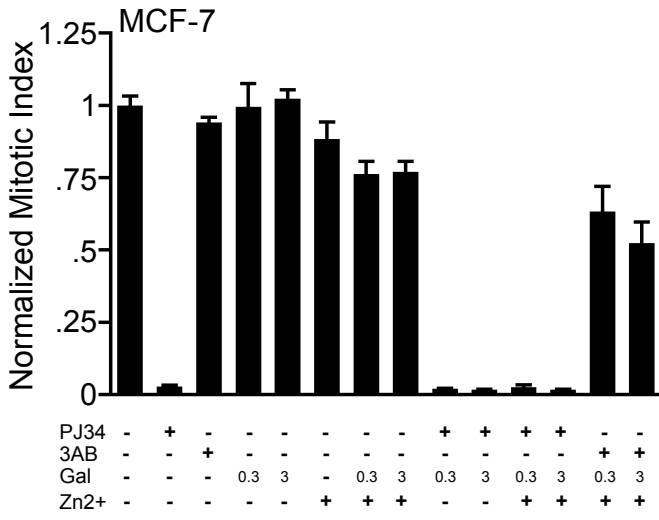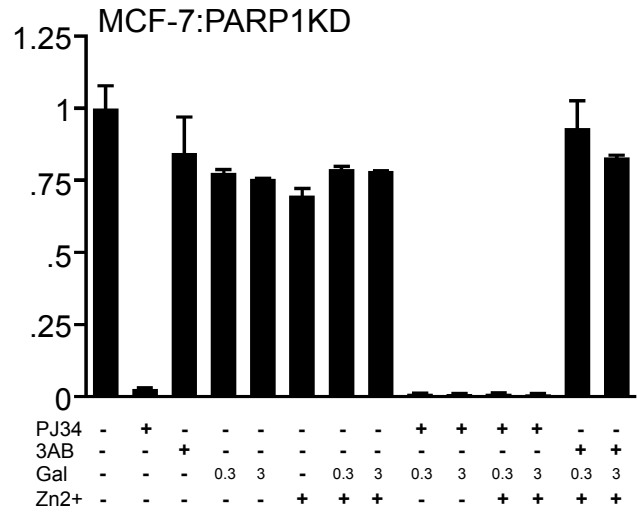

Supplement: NIHMS316213-supplement-03.pdf [file NIHMS316213-supplement-03.pdf]
